# Supplementary material for: Effects of bed baths with weak wiping pressure using cotton and disposable towels on the skin barrier function of the lower limbs in older patients with heart disease: A quasi- experimental (crossover) study
Source: Research Square preprint supplement (doi:10.21203/rs.3.rs-8134344/v1), 2025-12-02
Supplement: Supplementary file 1 [file 6253ef5e27fb240f260cbb50.docx]

**Additional file 2. Details of statistical information in Figure 4.**

|  | **T1** | | **T2** | | **T3** | | ***T*-test** | | | | | | | | |
| --- | --- | --- | --- | --- | --- | --- | --- | --- | --- | --- | --- | --- | --- | --- | --- |
|  | **Baseline** | | **15 min after** | | **Next day** | | **T2-T1** | | | **T3-T1** | | | **T3-T2** | | |
|  | **M** | **95%CI** | **M** | **95%CI** | **M** | **95%CI** | **MD** | **95%CI** | ***p*** | **MD** | **95%CI** | ***p*** | **MD** | **95%CI** | ***p*** |
| **Lower limb (n=27)** |  |  |  |  |  |  |  |  |  |  |  |  |  |  |  |
| **TEWL** |  |  |  |  |  |  |  |  |  |  |  |  |  |  |  |
| Cotton towel | 7.1 | 6.4, 7.8 | 7.2 | 6.3, 8.2 | 6.9 | 6.3, 7.5 | 0.2 | -0.7, 1.2 | .709 | -0.2 | -0.7, 0.4 | .510 | -0.3 | -1.1, 0.4 | .392 |
| Disposable towel | 7.1 | 6.2, 8.0 | 6.9 | 5.8, 7.9 | 7.7 | 7.1, 8.4 | -0.3 | -1.2, 0.7 | .586 | 0.6 | -0.2, 1.4 | .139 | 0.9 | -0.0, 1.7 | .050 |
| **SCH** |  |  |  |  |  |  |  |  |  |  |  |  |  |  |  |
| Cotton towel | 12.2 | 10.3, 14.1 | 11.1 | 9.8, 12.4 | 11.0 | 9.4, 12.5 | -1.2 | -2.4, 0.1 | .073 | -1.3 | -2.8, 0.3 | .102 | -0.1 | -1.4, 1.1 | .858 |
| Disposable towel | 12.4 | 10.3, 14.4 | 12.0 | 10.4, 13.6 | 11.1 | 9.7, 12.5 | -0.4 | -1.5, 0.8 | .523 | -1.2 | -2.5, 0.0 | .055 | -0.9 | -2.1, 0.4 | .166 |
| **Inner forearm (n=27)** |  |  |  |  |  |  |  |  |  |  |  |  |  |  |  |
| **TEWL** |  |  |  |  |  |  |  |  |  |  |  |  |  |  |  |
| Cotton towel | 8.4 | 7.5, 9.3 | 8.4 | 7.1, 9.8 | 7.8 | 7.1, 9.8 | 0.1 | -1.3, 1.4 | .936 | -0.6 | -1.6, 0.3 | .193 | -0.7 | -2.0, 0.7 | .307 |
| Disposable towel | 7.9 | 6.8, 8.9 | 8.1 | 7.2, 9.1 | 7.5 | 6.6, 8.4 | 0.3 | -1.0 1.6 | .655 | -0.3 | -1.1, 0.4 | .361 | -0.6 | -1.7, 0.5 | .247 |
| **SCH** |  |  |  |  |  |  |  |  |  |  |  |  |  |  |  |
| Cotton towel | 17.8 | 15.9, 19.8 | 15.7 | 13.7, 17.7 | 17.8 | 15.8, 19.8 | -2.2 | -3.5, -0.8 | **.004** | -0.1 | -1.1, 1.0 | .908 | 2.1 | 0.6, 3.6 | .007 |
| Disposable towel | 17.9 | 15.8, 19.9 | 16.0 | 14.3, 17.7 | 17.0 | 15.2, 18.8 | -1.9 | -3.2, -0.6 | .008 | -0.9 | -2.1, 0.3 | .148 | 1.0 | 0.1, 1.9 | .026 |

***Notes***: CI, confidence interval; M, the least square means as estimated by the mixed model; MD, mean difference; SCH, stratum corneum hydration; TEWL, transepidermal water loss.
